# Supplementary material for: Inhibition of Cyclin‐Dependent Kinase 5: A Strategy to Improve Sorafenib Response in Hepatocellular Carcinoma Therapy
Source: PubMed Central journal article supplement — Hepatology. 2018 Dec 22;69(1):376–93. doi: 10.1002/hep.30190 (PMC6590289; doi:10.1002/hep.30190), 2018-12-22
Supplement: HEP-69-376-s001.pdf [file HEP-69-376-s001.pdf]

## 1 **Online Methods**

2 **Cell lines.** HUH7 and Hep3B cells were obtained from Japanese Collection of Research  
3 Bioresources (JCRB) and ATCC, respectively. RIL175 cells were kindly provided by Prof.  
4 Simon Rothenfußer (Center of Integrated Protein Science Munich (CIPS-M) and Division of  
5 Clinical Pharmacology, Department of Internal Medicine IV, Klinikum der Universität  
6 München). For the cultivation of HUH7 and RIL175 DMEM (PAN Biotech GmbH, Aidenbach,  
7 Germany) supplemented with 10% FCS (Biochrom AG, Berlin, Germany) was used, while  
8 Hep3B cells were cultured in MEM Eagle (PAN Biotech GmbH, Aidenbach, Germany)  
9 supplemented with 10% FCS. All cells were cultured at 37 °C with 5% CO<sub>2</sub> in constant  
10 humidity in an incubator. Before cell seeding, all culture flasks, multiwell-plates and dishes  
11 were coated with collagen G (0.001% in PBS, Biochrom AG, Berlin, Germany).

12

13 **Compounds.** (R)-Roscovitine was obtained from Sigma-Aldrich. Sorafenib was obtained  
14 from Enzo Life Sciences. Dinaciclib and Gefitinib was obtained from Selleckchem. LGR1407  
15 was kindly provided by Libor Havlíček (Institute of Experimental Botany AS CR, Prague,  
16 Czech Republic) (1).

17

18 **Transfection experiments – Cdk5 shRNA.** For the transduction of HUH7 and Hep3B cells  
19 with Cdk5 shRNA and nt shRNA, Cdk5 MISSION® shRNA Lentiviral Transduction Particles  
20 (Vector: pLKO.1-puro; SHCLNV-NM\_004935; Clone ID: (1) TRCN0000021465, (2)  
21 TRCN0000021466, (3) TRCN0000021467, (4) TRCN0000194974, (5) TRCN0000195513;  
22 Sigma-Aldrich, Taufkirchen, Germany) and MISSION® pLKO.1-puro Non-Mammalian  
23 shRNA Control Transduction Particles (SHC002V; Sigma-Aldrich, Taufkirchen, Germany) as  
24 a non-targeting control were used according to the manufacturer's protocol. Both cell lines  
25 were transduced with a multiplicity of infection (MOI) of one. Successfully transduced cells  
26 were selected by adding 2 µg/ml puromycin (Thermo Fisher Scientific, Waltham, MA) to the  
27 medium. After the initial selection, puromycin concentration was reduced to 1 µg/ml for

28 further cultivation to ensure the stable transfection with Cdk5 and nt shRNA. By using  
29 Western Blot analysis the most efficient and well tolerated clones were selected.

30

31 **Genome engineering using the CRISPR/Cas9 system.** For the knockout of Cdk5 in murine  
32 RIL175 cells the CRISPR-Cas9 system was used as described previously (2). In short, we  
33 decided to introduce an InDel-mutation in exon 2 of Cdk5. Therefore we sequenced the  
34 genomic region of interest (Cdk5 sequencing primer: 5'-GAGTTTATGGCAGATTCTCC-3')  
35 and designed single guide RNAs (sgRNAs) as described previously (3). The three top-  
36 ranked sgRNAs were used for further experiments and were inserted into the  
37 eCas9\_Puro2.0 plasmid using the T4 DNA ligase protocol provided by the manufacturer  
38 (New England BioLabs, Frankfurt a.M., Germany). After transformation into competent  
39 DH5 $\alpha$ -E.coli, plasmids were isolated using the QIAGEN Plasmid Maxiprep Kit (Qiagen,  
40 Hilden, Germany) according to the manufacturer's protocol and sequenced starting from the  
41 U6 promotor to validate the correct insertion. RIL175 wild-type cells were then transfected  
42 with the respective plasmids using Lipofectamine™ 3000 reagent (Invitrogen, Hilden,  
43 Germany) as described by the manufacturer. After selection with puromycin, genome  
44 targeting efficiency was checked using T7 DNA endonuclease I as described by the  
45 manufacturer (New England BioLabs, Frankfurt a.M., Germany). Cells transfected with the  
46 most efficient sgRNA (Cdk5 sgRNA top: 5'-CACCGGCTCTGAAGCGTGTCAGGC-3'; bottom:  
47 5'-AAACGCCTGACACGCTTCAGAGCC-3') were diluted for clonal selection. Gene knockout  
48 in identified clones was confirmed with sequencing and Western blot. Sequencing services,  
49 sequencing primers, cloning oligomers and PCR primers were provided by Eurofins  
50 Genomics GmbH (Ebersberg, Germany).

51

52 **Proliferation assay.** The proliferation of HCC cells was evaluated using the xCELLigence  
53 system (Roche Diagnostics, Mannheim, Germany). The respective cell lines were seeded at  
54 the given density in 100  $\mu$ l growth medium in equilibrated 16-well E-plates (HUH7: 2 x 10<sup>3</sup>  
55 cells per well; Hep3B: 4 x 10<sup>3</sup> cells per well). After an initial incubation of 24 h without any

56 compounds, cells were either treated with different substances for 72 h or left untreated as a  
57 control (4 wells per experimental condition). Through impedance measurement, the  
58 xCELLigence system evaluates the cell index, a dimensionless parameter, which is  
59 proportional to the cell number and recorded every hour. In each figure, the cell index is  
60 displayed as one representative experiment. After normalizing the cell index to the start  
61 point of treatment, the doubling time was evaluated by the xCELLigence software and served  
62 for statistical evaluation. Doubling time was calculated from at least three independent  
63 experiments.

64 For the evaluation of synergism, two separate methods were used. First, the Combination  
65 Subthresholding approach was used where synergy is assumed, if both single treatments  
66 alone show no significant benefit over the untreated control, while the combination of both  
67 treatments shows a significant effect (4). Secondly, synergism was calculated using the Bliss  
68 Independence model (5). Therefore, the Bliss Value (BV) was evaluated by comparing the  
69 effects of drug A ( $E_A$ ) and drug B ( $E_B$ ) with the effect of the combination of both drugs ( $E_{AB}$ )  
70 according to the following formula:

$$71 \quad BV = \frac{E_{AB}}{(E_A + E_B) - (E_A \times E_B)}$$

72

73 Synergistic effects were assumed with  $BV > 1$ , antagonistic effects with  $BV < 1$  and additive  
74 effects with  $BV = 1$ .

75

76 **Clonogenic assay.** For the evaluation of long term cell survival, cells were seeded into 6-  
77 well plates and treated with the respective compounds for 24 h. After the incubation, cells  
78 were trypsinized and reseeded at a density of  $1 \times 10^4$  cells per well into a 6-well plate. After  
79 incubation for 7 d, viable cells were stained with crystal violet solution for 10 min (RT). Bound  
80 dye was solubilized by adding 1 ml dissolving buffer and the absorbance at 550 nm was  
81 measured using a SpectraFluor Plus™ plate reader (Tecan, Crailsheim, Germany).

82

83

84 **Immunohistochemistry.** 5  $\mu\text{m}$  sections of paraffin embedded tumors from the xenograft  
85 mouse model were used for IHC. Therefore the slides were first deparaffinized and  
86 rehydrated. Thereafter the sections were boiled in sodium citrate buffer (10 mM sodium  
87 citrate, 0.05% Tween 20, pH 6.0) for antigen retrieval, before endogenous peroxidase was  
88 blocked by incubation in 7.5% hydrogen peroxide for 10 min. As an indicator for proliferating  
89 cells a primary antibody against Ki67 (1:100, Abcam, ab15580) was applied for 1 h at room  
90 temperature. The Vectastain<sup>®</sup> Universal Elite ABC Kit (Vector Laboratories, Burlingame, CA)  
91 was used for antibody detection according to the manufacturer's protocol and AEC (Thermo  
92 Fisher Scientific, Waltham, MA) was used as a chromogen. The slides were then  
93 counterstained with hematoxylin (Sigma Aldrich, Taufkirchen, Germany) for 1 min before  
94 being washed with distilled water. The sections were embedded in FluorSave<sup>™</sup> Reagent  
95 mounting medium and covered with glass coverslips. Images were collected with an  
96 Olympus BX41 microscope and an Olympus DP25 camera (Olympus, Hamburg, Germany).

97

98 **Cell cycle and apoptosis analysis.** Cell cycle analysis and evaluation of apoptosis rates  
99 was performed as described by Nicoletti et. al. (6). In detail, cells were seeded at a density  
100 of  $8 \times 10^4$  cells per well into 24 well plates and treated with Sorafenib (5  $\mu\text{M}$ , 24, 48 and 72  
101 h). After incubation cells were trypsinized, washed with PBS and centrifuged (600 g, 4°C, 10  
102 min). Further cells were permeabilized and stained by adding fluorochrome solution (FS)  
103 containing propidium iodide (Sigma Aldrich, Taufkirchen, Germany). After an overnight  
104 incubation at 4 °C, cells were analysed by flow cytometry on a FACSCalibur (Becton  
105 Dickinson, Heidelberg, Germany). For the determination of cell populations in different cell  
106 cycle phases and the percentage of apoptotic cells the FlowJo 7.6 analysis software (Tree  
107 Star Inc., Ashland, USA) was used.

108

109 **Migration/invasion assays.** To examine the migratory ability of HCC cells under the  
110 influence of various compounds, cells were first seeded into 6-well plates and either left  
111 untreated or pretreated with the indicated agent for 24 h. After pretreatment, cells were

112 trypsinized, centrifuged (1000 rpm, 5 min, RT) and resuspended in DMEM or DMEM  
113 containing chemotherapeutic agents.  $1 \times 10^5$  cells per condition were seeded into collagen G  
114 coated Transwell® Permeable Supports (8  $\mu\text{m}$  pore polycarbonate inserts, Corning Inc., New  
115 York, NY), which were then placed into a 24-well plate containing 700  $\mu\text{l}$  DMEM (negative  
116 control) or DMEM containing 10% FCS per well. Cell were allowed to migrate for 16 h  
117 (HUH7) or 24 h (Hep3B) before being stained with crystal violet. Migrated cells were counted  
118 in 5 fields under a 10-fold objective lense of a Zeiss Axiovert 25 microscope (Zeiss, Jena,  
119 Germany) and imaged with a Canon 450D camera (Canon, Krefeld, Germany). Cell counting  
120 was performed by using the particle counter plugin of the ImageJ software. For the  
121 evaluation of invasive capabilities the Transwell® Permeable Supports were coated with  
122 Matrigel® (Corning Inc., New York, NY) to simulate extracellular matrix.

123

#### 124 **Proteomic analysis via LC-MS/MS.**

125 *Treatment of cells.* Nt shRNA and Cdk5 shRNA HUH7 cells were seeded at a density of 0.35  
126  $\times 10^6$  cells per well into 6-well plates and treated with Sorafenib (0.5  $\mu\text{M}$ , 5 $\mu\text{M}$ , 24h). After  
127 incubation cells were washed five times with PBS and detached with trypsin/EDTA. To  
128 remove excessive trypsin/EDTA cells were centrifuged (1000 rpm, 5 min, 4°C). Cell pellets  
129 were resuspended in 100  $\mu\text{l}$  ice-cold PBS and stored at -80°C until further processing.

130 *Sample processing.* Per  $1 \times 10^5$  cells 20  $\mu\text{l}$  of 8 M urea / 0.4 M  $\text{NH}_4\text{HCO}_3$  was added. Cells  
131 were lysed using an ultrasonic device (Sonoplus GM3200 with BR30 cup booster, Bandelin,  
132 Berlin, Germany) applying 10,000 kJ. For further homogenization, samples were centrifuged  
133 through QIA-Shredder devices (Qiagen, Hilden, Germany). Protein concentrations were  
134 determined by Bradford assays and adjusted to 0.6 mg/ml with 8 M urea/0.4 M  $\text{NH}_4\text{HCO}_3$ . To  
135 cleave bisulfide bonds, 25  $\mu\text{g}$  of total protein was incubated with DTE at a concentration of  
136 4.5 mM for 30 min and free sulfhydryl residues were blocked with iodoacetamide (final  
137 concentration 10 mM) for 30 min in the dark. After dilution with water to a concentration of 1  
138 M urea, 0.5  $\mu\text{g}$  porcine trypsin (Promega, Madison, WI, USA) was added and incubated  
139 overnight at 37 °C.

140 *Liquid-chromatography mass spectrometry.* Chromatography of peptides was performed on  
141 an EASY-nLC 1000 chromatography system (Thermo Scientific, Waltham, MA) coupled to an  
142 Orbitrap XL instrument (Thermo Scientific). 2.5 µg of peptides diluted in 0.1 % formic acid  
143 (FA) were transferred to a trap column (PepMap100 C18, 75 µm x 2 cm, 3 µm particles,  
144 Thermo Scientific) and separated at a flow rate of 200 nL/min (Column: PepMap RSLC C18,  
145 75 µm x 50 cm, 2 µm particles, Thermo Scientific) using a 260 min linear gradients from 5 %  
146 to 25 % solvent B (0.1 % formic acid, 100 % ACN) and a consecutive 60 min linear gradient  
147 from 25 % to 50 % solvent B. For data acquisition, a top five data dependent CID method  
148 was used.

149 *Proteomic data processing.* For the quantitative analysis of the data obtained from the mass  
150 spectrometry screen the MaxQuant and Perseus software packages (provided by Max  
151 Planck Institute of Biochemistry, Munich) were used.

152

153 **Quantitative real-time PCR analysis.** For the isolation of mRNA from cell culture samples  
154 the Qiagen RNeasy Mini Kit (Qiagen, Hilden, Germany) was used according to the  
155 manufacturer's protocol. Concentration of mRNA in each sample was determined with the  
156 NanoDrop® ND-1000 spectrophotometer (Nanodrop Technologies, Erlangen, Germany). For  
157 the creation of cDNA templates from mRNA by reverse transcription the High-Capacity cDNA  
158 Reverse Transcription Kit (Applied Biosystems, Foster City, CA) was used as described by  
159 the manufacturer. The Real-Time-Polymerase chain reaction was performed with the ABI  
160 7300 Real Time PCR System (Applied Biosystems, Foster City, CA) using SYBR Green  
161 Master Mix (ThermoFisher Scientific, Waltham, MA) and respective primers. Actin was used  
162 as a housekeeping gene. In order to evaluate changes in mRNA levels the  $\Delta\Delta\text{CT}$  method  
163 was used as described earlier (7).

164

165 **Western blot analysis and antibodies.** Proteins were separated on a SDS-PAGE gel,  
166 transferred to a nitrocellulose membrane (Hybond-ECL™, Amersham Bioscience) and  
167 incubated with a primary antibody overnight at 4 °C. The following antibodies were used:

168 pAkt (Ser473) (1:500, Cell Signaling Technologies, 9271), Akt (1:1000, Cell Signaling  
169 Technologies, 9272), pErk (Thr202/Tyr204) (1:1000, Cell Signaling Technologies, 9106), Erk  
170 (1:1000, Cell Signaling Technologies, 9102), pEGFR (Tyr1068) (1:1000, Cell Signaling  
171 Technologies, 2234), EGFR (1:1000, Cell Signaling Technologies, 2239), pH2A.X (1:1000,  
172 Cell Signaling Technologies, 2577), actin (1:1000, Merck Millipore, MAB1501),  
173 p62/Sequestosome1 (1:1000, Cell Signaling Technologies, 8025), LC3 (1:1000, Cell  
174 Signaling Technologies, 4108), FTH1 (1:1000, Sigma Aldrich, F5012), LIN28B (1:1000, Cell  
175 Signaling Technologies, 4196), CA2 (1:1000, ThermoFisher Scientific, PA5-28267), Vimentin  
176 (1:1000, Cell Signaling Technologies, 5741). As loading control, the stain-free technology  
177 (Bio Rad) was used. This technique enables a quantification of the whole lane protein, and  
178 therefore can be used for the normalization of protein bands (8). Proteins were visualized  
179 using horseradish peroxidase coupled secondary antibodies and ECL solution containing 2.5  
180 mM luminol. Chemiluminescence was detected with the Chemidoc™ Touch Imaging system  
181 (Bio-Rad, Munich, Germany).

182

183 **Glycolysis Stress Test.** nt and Cdk5 shRNA HUH7 cells were seeded at a density of  $1.5 \times$   
184  $10^4$  into a XF<sup>e</sup>96 microplate and grown for 24 h prior to Sorafenib treatment (0.5  $\mu$ M, 5  $\mu$ M,  
185 24 h). The Seahorse Glycolysis Stress Test Kit was used in combination with the Seahorse  
186 XFe96 Analyzer (Agilent Technologies, Santa Clara, CA) as described by the manufacturer.  
187 Results were normalized to DNA content measured with CyQuant® GR dye solution  
188 (ThermoFisher Scientific, Waltham, MA) according to the manufactures protocol. Data  
189 analysis was performed with Wave 2.3.0 software and Seahorse XF Glycolysis Stress Test  
190 Report Generator (Agilent Technologies, Santa Clara, CA). For statistical analysis the  
191 following parameters were calculated from the respective graphs:  
192 ECAR: Non-glycolytic acidification (NGA), glycolysis (G), glycolytic capacity (GC) and  
193 glycolytic reserve (GR) (Table 2); OCR: Non-glycolytic OCR (NG-OCR) and glycolytic OCR  
194 (G-OCR) (Table 3).

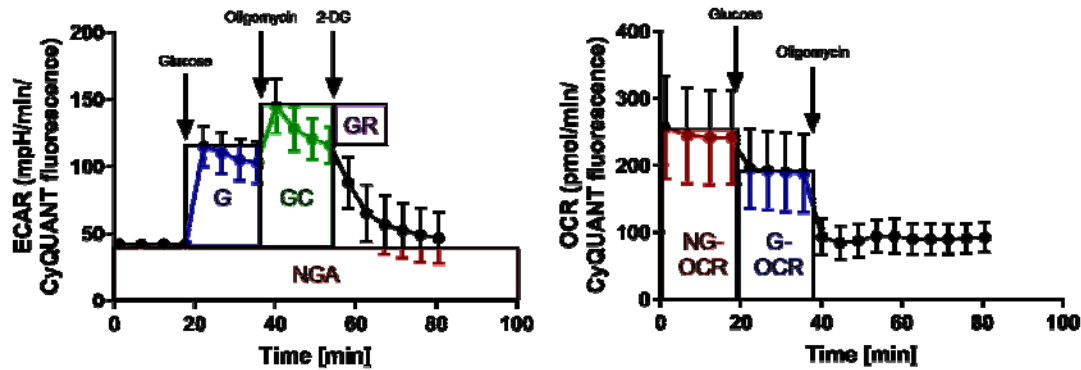

195

196 Figure 1 – Seahorse glycolysis stress test parameters for ECAR (left panel) and OCR  
 197 (right panel).

198

199 **Human HCC microarrays.** Tissue microarrays (TMA), containing human HCC samples and  
 200 matched surrounding non-tumor tissue were produced. The TMAs included 115 patients  
 201 which had been treated with liver transplantation or partial hepatectomy at the University  
 202 Clinic Munich Großhadern between 2008 and 2013. The formalin-fixed, paraffin-embedded  
 203 blocks were cut into 2 mm thick slices and mounted on SuperFrost Plus microscope slides  
 204 (Menzel Gläser, Braunschweig, Germany). After deparaffinization and rehydration all slides  
 205 were Hematoxilien-Eosin stained in a standard manner (Vector Laboratories, Burlingame,  
 206 CA, USA). Several blank-slides were set aside for immunohistochemical stainings.

207 Staining for EGFR was performed by using a Ventana Benchmark XT autostainer using the  
 208 XT UltraView diaminobenzidine kit (Ventana Medical Systems). The Ventana EGFR-antibody  
 209 clone 3C6 (ready to use) was used.

210 EGFR-staining of the TMA section was assessed using the immunoreactive score as  
 211 described previously (9): 0 – absent; 1-4 –weak; 5-8 – moderate; 9-12 – strong expression.

212 Images were obtained with a digital network microscope Leica DMD108 (Leica Biosystems  
 213 Nussloch, Germany).

214

215 **Statistical analysis.** All listed experiments were conducted at least three times unless  
 216 otherwise indicated in the figure legends. The given data is presented as mean  $\pm$  SEM and



217 statistical significance was considered if  $P \leq 0.05$ . The statistical analysis was performed with  
218 GraphPad Prism software version 7.0 (GraphPad Software, San Diego, USA).

219

220 1. Weitensteiner SB, Liebl J, Krystof V, Havlicek L, Gucky T, Strnad M, Furst R, et al.  
221 Trisubstituted pyrazolopyrimidines as novel angiogenesis inhibitors. PLoS One  
222 2013;8:e54607.

223 2. Ran FA, Hsu PD, Wright J, Agarwala V, Scott DA, Zhang F. Genome engineering  
224 using the CRISPR-Cas9 system. Nat Protoc 2013;8:2281-2308.

225 3. Haeussler M, Schonig K, Eckert H, Eschstruth A, Mianne J, Renaud JB, Schneider-  
226 Maunoury S, et al. Evaluation of off-target and on-target scoring algorithms and integration  
227 into the guide RNA selection tool CRISPOR. Genome Biol 2016;17:148.

228 4. Fouquier J, Guedj M. Analysis of drug combinations: current methodological  
229 landscape. Pharmacol Res Perspect 2015;3:e00149.

230 5. Berenbaum MC. What is synergy? Pharmacol Rev 1989;41:93-141.

231 6. Nicoletti I, Migliorati G, Pagliacci MC, Grignani F, Riccardi C. A rapid and simple  
232 method for measuring thymocyte apoptosis by propidium iodide staining and flow cytometry.  
233 J Immunol Methods 1991;139:271-279.

234 7. Fleige S, Walf V, Huch S, Prgomet C, Sehm J, Pfaffl MW. Comparison of relative  
235 mRNA quantification models and the impact of RNA integrity in quantitative real-time RT-  
236 PCR. Biotechnol Lett 2006;28:1601-1613.

237 8. Colella AD, Chegenii N, Tea MN, Gibbins IL, Williams KA, Chataway TK. Comparison  
238 of Stain-Free gels with traditional immunoblot loading control methodology. Anal Biochem  
239 2012;430:108-110.

240 9. Remmele W, Stegner HE. [Recommendation for uniform definition of an  
241 immunoreactive score (IRS) for immunohistochemical estrogen receptor detection (ER-ICA)  
242 in breast cancer tissue]. Pathologie 1987;8:138-140.

243

244 **Table 1 – PCR Primer**

| Gene     | forward primer               | reverse primer              |
|----------|------------------------------|-----------------------------|
| ABCB1    | 5'-TCGTAGGAGTGTCCGTGGAT-3'   | 5'-ATGTGCCACCAAGTAGGCTC-3'  |
| AKR7A2   | 5'-TTCTACCTACACGCACCTGAC-3'  | 5'-ATAGTTGGAGAGGCCAAGCTC-3' |
| ANPEP    | 5'-ATCCCTGTCATCAATCGGGC-3'   | 5'-GTTGGGGTGGATCGGGTTAT-3'  |
| APOB     | 5'-AATGGCCCCGTTTACCATGA-3'   | 5'-GGTCTTGAGTTTCCAGGTGC-3'  |
| ARF5     | 5'-TGAGCGAGCTGACTGACAAG-3'   | 5'-GAAACCCAGATCCCTGCTCC-3'  |
| CA2      | 5'-GTACGGCAAACACAACGGAC-3'   | 5'-CTGTAAGTGCCATCCAGGGG-3'  |
| CARHSP1  | 5'-AGAACGGATTGCAGGGTCA-3'    | 5'-TCCCACAAGCACAGGACAAG-3'  |
| CLDN1    | 5'-GCTGGGCTTCCCTAGATGTC-3'   | 5'-GAGGTGGGCAGTCCTTTGTT-3'  |
| DDT      | 5'-GCCCTGACCCAGAAACGACT-3'   | 5'-CAGCTCCTCAGATGTCCGTG-3'  |
| EGFR     | 5'-GGCCTAAGATCCCGTCCATC-3'   | 5'-TGGCTTTCGGAGATGTTGCT-3'  |
| ENTPD5   | 5'-AAATTGCCTCTGCAGGTGTG-3'   | 5'-GCTGTCCTGGCATTCTTCTGC-3' |
| FABP5    | 5'-AGGAGTGGGAATAGCTTTGCG-3'  | 5'-GCTGAACCAATGCACCATCT-3'  |
| FAM115A  | 5'-GCGGGGCAAACAAAACCAATA-3'  | 5'-GGGAACGTGAACAGAACCCT-3'  |
| FTH1     | 5'-TCAACAGTGCTTGGACGGAA-3'   | 5'-GTCCTGGTGGTAGTTCTGGC-3'  |
| FTL      | 5'-GCTCCTTCTTGCCAACCAAC-3'   | 5'-GCCCAGAGAGAGGTAGGTGT-3'  |
| G6PD     | 5'-TCCTGCATGAGCCAGATAGG-3'   | 5'-TGCGGTAGATCTGGTCCTCA-3'  |
| GLDC     | 5'-AGAAACATCTCGCCCCGTTT-3'   | 5'-TCCGTCTTCCAACCATCAGC-3'  |
| H2AFY    | 5'-GGCCCGGAAATCCAAGAAGA-3'   | 5'-ACACTTGTCTGCACCCCAAA-3'  |
| HGD      | 5'-AGAGAGGAATGCGGTTTACGC-3'  | 5'-TTGCCTCATAGTGACCTCGG-3'  |
| HPRT1    | 5'-AGGCGAACCTCTCGGCTTTC-3'   | 5'-AATCCGCCCAAAGGGAACTG-3'  |
| HSD17B11 | 5'-TGCAAAGAAGGTGAAGGCAGAA-3' | 5'-TGAAGACTGCCAAAGCCTCA-3'  |
| HTATIP2  | 5'-CAGGGAAGGTGGGATGCTC-3'    | 5'-CCATTCACCTGGGCGAGATT-3'  |
| IDI1     | 5'-CTTTCGGATTGGGAGGGCTT-3'   | 5'-GCCAATCACGCTTTCGATCC-3'  |
| KPNA2    | 5'-TCGAGGTGGACCCTTTGAAC-3'   | 5'-TGGGGCACAACCTCCTGTTTT-3' |
| LGAL3    | 5'-GCCAACGAGCGGAAAATGG-3'    | 5'-CAGGCCATCCTTGAGGGTTT-3'  |

|         |                              |                             |
|---------|------------------------------|-----------------------------|
| LIN28B  | 5'-GGAAAGCACATTAGACCATGCG-3' | 5'-TATCCAAGGGGCTTCCCTCT-3'  |
| NCEH1   | 5'-CGAAGAGCCACTGAAACGCA-3'   | 5'-GACCAGGACGCACTTGCACT-3'  |
| P4HA1   | 5'-CAGTACATGACCCTGAGACTGG-3' | 5'-CGTGCAAAGTCAAAATGGGGT-3' |
| PSMD12  | 5'-GCTAGCCAAGGAAGGAAGACT-3'  | 5'-CATCCGTTGCAGGACTCTCA-3'  |
| PYCR1   | 5'-CCCTCTCCCCGTACTTTTCC-3'   | 5'-CCCATCTTCACACCCCATC-3'   |
| RAB10   | 5'-ATTTTGTCCCGACCGACTCC-3'   | 5'-ACGAAAAGGACGCAGGTCT-3'   |
| RBX1    | 5'-GTACTGTGCGCATGGGGAGTC-3'  | 5'-ACTCTGCCTTGAGCTGTTGG-3'  |
| RCN1    | 5'-ATGTTTGTGCGGAAGCCAAGC-3'  | 5'-TCACTGGACTGGATGGGACA-3'  |
| S100P   | 5'-AGTTCATCGTGTTCTGGCT-3'    | 5'-CACTTTTGGGAAGCCTGGGA-3'  |
| SCARB1  | 5'-GTCCATCTACCCACCCAACG-3'   | 5'-CCCTACAGTTTTGCTTCTGC-3'  |
| SCFD1   | 5'-GAAAGGCAGACAGTGGCTTTG-3'  | 5'-TAAGGGCCTCTGGAAGCTGA-3'  |
| SDCBP   | 5'-AACCTGCCAATCCAGCAAT-3'    | 5'-GGTCTTGCTACCAACTGCC-3'   |
| SFN     | 5'-ACTACGAGATCGCCAACAGC-3'   | 5'-CAGTGTGAGTTGTCTCGCA-3'   |
| SQSTM1  | 5'-CTCCGCGTTCGCTACAAAAG-3'   | 5'-TCCTCGTCACTGGAAAAGGC-3'  |
| SULT2A1 | 5'-AGTGAAACGGAGAGTCCACG-3'   | 5'-GGCATCCAGCCATGAATGTG-3'  |
| TF      | 5'-GAGTATGCGAACTGCCACCT-3'   | 5'-GCTGTAGGGAAAGACCAGACG-3' |
| TOP2A   | 5'-GCGGGCTAAAGGAAGTTCAA-3'   | 5'-ACTAAACAGGCAGGACCCCA-3'  |
| TPD52L2 | 5'-AGTGACCCAGTCAGACCTCTA-3'  | 5'-AGCTGCTGAGGGTCAGTTTC-3'  |
| VIM     | 5'-CGGCGGGACAGCAGG-3'        | 5'-TCGTTGGTTAGCTGGTCCAC-3'  |

245

246 **Table 2 – ECAR Parameters**

| ECAR Parameter               | Rate Measurement Equation                                                                                                                                   | Abbreviation |
|------------------------------|-------------------------------------------------------------------------------------------------------------------------------------------------------------|--------------|
| Non-Glycolytic Acidification | Last rate measurement before glucose injection<br>(Maximum rate measurement before Oligomycin injection) - (Last rate measurement before Glucose injection) | NGA<br>G     |
| Glycolysis                   | (Maximum rate measurement after Oligomycin injection) - (Last rate measurement before Glucose injection)                                                    | GC           |
| Glycolytic Capacity          | (Glycolytic Capacity) - (Glycolysis)                                                                                                                        | GR           |

247

248 **Table 3 – OCR Parameters**

| <b>OCR Parameter</b> | <b>Rate Measurement Equation</b>                     | <b>Abbreviation</b> |
|----------------------|------------------------------------------------------|---------------------|
| Non-Glycolytic OCR   | Last rate measurement before glucose injection       | NG-OCR              |
| Glycolytic OCR       | Minimum rate measurement before Oligomycin injection | G-OCR               |

249

**Supplementary Fig. 1. Combination of Cdk5 inhibition and Sorafenib.**

(A) Western Blot showing Cdk5 protein levels in non-targeting (nt) and Cdk5 shRNA HUH7 cells. (B) Western Blot showing Cdk5 protein levels in non-targeting (nt) and Cdk5 shRNA Hep3B cells (C) Western Blot showing Cdk5 protein levels in RIL175 wild-type cells and RIL175 Cdk5 knockout (Cdk5 KO) cells generated via the CRISPR-Cas9 method. (D) Clonogenic survival of HUH7 cells treated with either Sorafenib (5  $\mu$ M), roscovitine (10  $\mu$ M) or combination of both is shown. One Way ANOVA, Tukey  $**P < 0.01$ ,  $n=3$ . (E) Clonogenic survival of HUH7 cells treated with Sorafenib is shown. t-test  $*P < 0.05$ ,  $n=3$ .

**Supplementary Fig. 2. Combination of Cdk5 inhibition and Sorafenib does not affect DNA damage, cell cycle and apoptosis**

(A) Immunoblot of non-targeting (nt) and Cdk5-1/4 shRNA HUH7 cells treated with Sorafenib and probed for phosphorylated H2A.X is shown. (B) Apoptosis of Sorafenib treated non-targeting (nt) and Cdk5 shRNA HUH7 cells is shown. One Way ANOVA, Tukey  $*P < 0.05$ ,  $n=3$ . (C) Cell cycle analysis of non-targeting (nt) and Cdk5 shRNA HUH7 cells after treatment with Sorafenib is shown. The bar graph displays respective quantitative evaluations. ns: not significant; unpaired t-test,  $n=3$

**Supplementary Fig. 3. Proteomic analysis of Cdk5 knockdown cells treated with Sorafenib**

(A) Table of proteins showing alterations of protein abundance ( $P < 0.05$ ; log2-fold change  $> |0.6|$ ) between non-targeting (nt) and Cdk5 shRNA HUH7 cells treated with Sorafenib together with their respective gene names, x-fold changes (nt 5  $\mu$ M Sorafenib vs. Cdk5 5  $\mu$ M Sorafenib) and  $P$ -values. (B) Volcano Plot visualizing the protein hits given in A is shown. (C) Protein interaction map of protein hits given in A created with string-db.org. (protein-protein interaction enrichment  $P$ -value:  $1.57 \times 10^{-6}$ ).

**Supplementary Fig. 4. Analysis of targets from the proteomic screen**

Bar graphs display mRNA expression of selected proteins yielded from the proteomic analysis of untreated (A) or Sorafenib treated (B) nt and Cdk5 shRNA HUH7 cells. Paired t-test,  $*P < 0.05$ ,  $**P < 0.01$ ,  $***P < 0.001$ ,  $****P < 0.0001$ ,  $n=3$ . (C) Representative immunoblots of nt and Cdk5 shRNA HUH7 cells treated with Sorafenib and probed with antibodies against proteins of interest (Carbonic Anhydrase 2 (CA2), Lin28B, Ferritin Heavy Chain (FTH), Vimentin) from the proteomics screen are shown.

**Supplementary Fig. 5. Sorafenib affects the metabolism of HCC cells**

Glycolysis Stress Test of non-targeting (nt) and Cdk5 shRNA HUH7 cells that were pre-treated with Sorafenib before consecutive exposure to D-glucose, oligomycin and 2-DG is shown. ECAR and OCR were recorded using a Seahorse XFe96 Analyzer and normalized with CyQUANT® GR dye. (A-E) Normalized ECAR (upper left) and OCR (upper right) of untreated and Sorafenib treated non-targeting (nt) and Cdk5 shRNA HUH7 cells are compared. For statistical analysis the following parameters were compared for ECAR (lower left): NGA (non-glycolytic acidification), G (glycolysis), GC (glycolytic capacity), GR (glycolytic reserve) and for OCR (lower right): NG-OCR (non-glycolytic oxygen consumption rate), G-OCR (glycolytic oxygen consumption rate). Multiple t-tests, ns: not significant  $n=3$ .

**Supplementary Fig. 6. Cdk5 inhibition prevents compensatory EGFR activation in Hep3B cells after Sorafenib treatment.**

49 Immunoblots from non-targeting (nt) and Cdk5 shRNA Hep3B cells treated with Sorafenib  
50 probed with antibodies for phosphorylated EGFR (p-EGFR), EGFR (A), phosphorylated Akt  
51 (p-Akt) and Akt (B), phosphorylated Erk (p-Erk), Erk (C), are shown. n=2.

52

53 **Supplementary Fig. 7. EGFR protein levels are high in human HCC.**

54 (A) Immunostaining of patient tissue for EGFR (red) in HCC tissue and healthy liver tissue is  
55 shown. (B) Percentage of EGFR positive cells in HCC tissue is shown. (C) Staining intensity  
56 of EGFR in HCC tissue is shown. (D) Immunoreactive score for EGFR in HCC tissue is  
57 shown.

58

59 **Supplementary Table 1. Correlation of EGFR staining with clinical parameters**

60 Contingency tables correlating percentage of EGFR positive cells, EGFR staining intensity  
61 and EGFR IRS with r-classification (R0: no residual tumor, R1: residual tumor, X: N/A) (A),  
62 frequency of recurrence (0: no tumor recurrence, 1: tumor recurrence) (B), cause of death  
63 (C), tumor stage (D) and tumor grading (E) are shown.

64

65 **Supplementary Video 1.**

66 Live cell imaging of nt shRNA (left) and Cdk5 shRNA (right) HUH7 cells expressing eGFP-  
67 EGFR is shown.

68

69 **Supplementary Video 2.**

70 Live cell imaging of nt shRNA (left) and Cdk5 shRNA (right) Hep3B cells expressing eGFP-  
71 EGFR is shown.

72

73 **Supplementary Video 3.**

74 Live cell imaging of nt shRNA (left) and Cdk5 shRNA (right) HUH7 cells expressing eGFP-  
75 Integrin  $\alpha 5$  (ITGA5) is shown.

76

77 **Supplementary Video 4.**

78 Live cell imaging of nt shRNA (left) and Cdk5 shRNA (right) Hep3B cells expressing eGFP-  
79 Integrin  $\alpha 5$  (ITGA5) is shown.

80

81 **Supplementary Video 5.**

82 Live cell imaging of nt shRNA (left) and Cdk5 shRNA (right) HUH7 cells expressing eGFP-c-  
83 Met is shown.

84

85 **Supplementary Video 6.**

86 Live cell imaging of nt shRNA (left) and Cdk5 shRNA (right) Hep3B cells expressing eGFP-c-  
87 Met is shown.

88

89

90

## Supp. Fig. 1

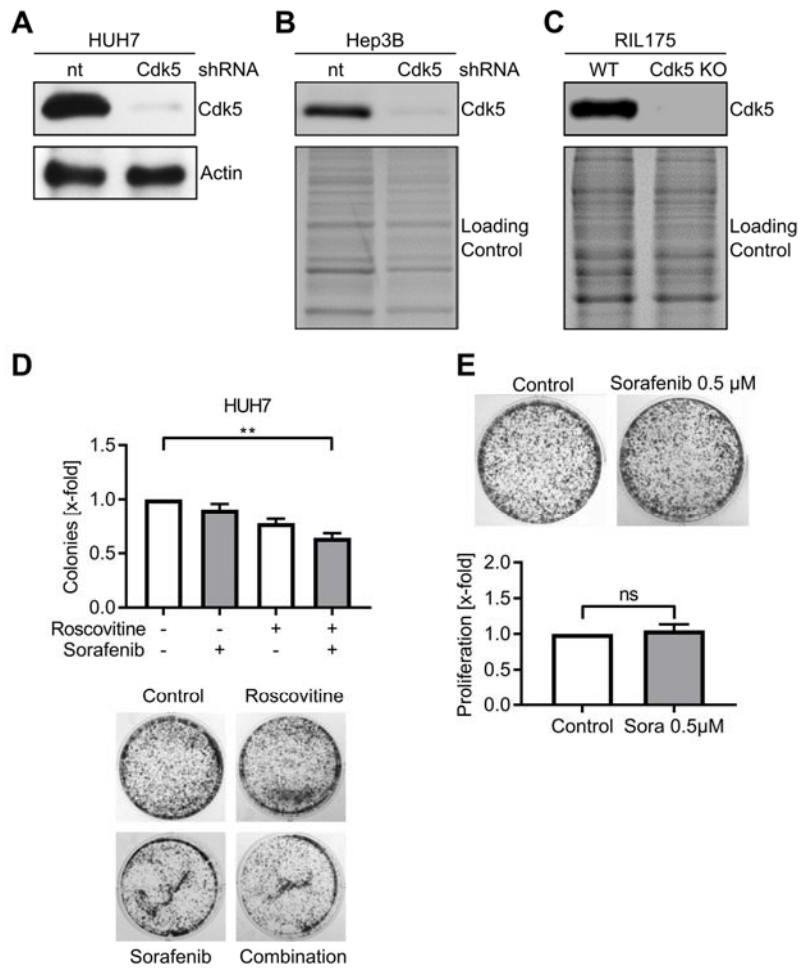

## Supp. Fig. 2

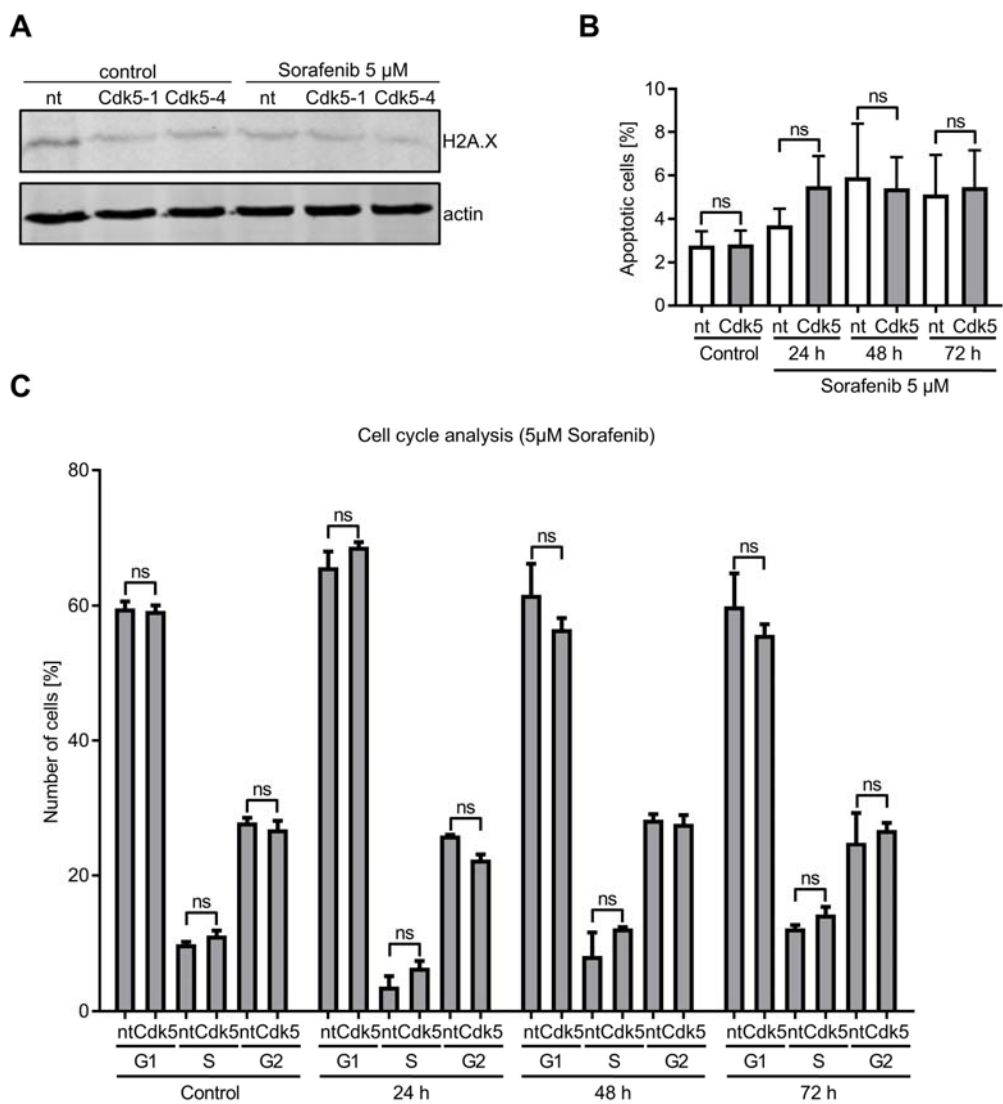



## Supp. Fig. 3

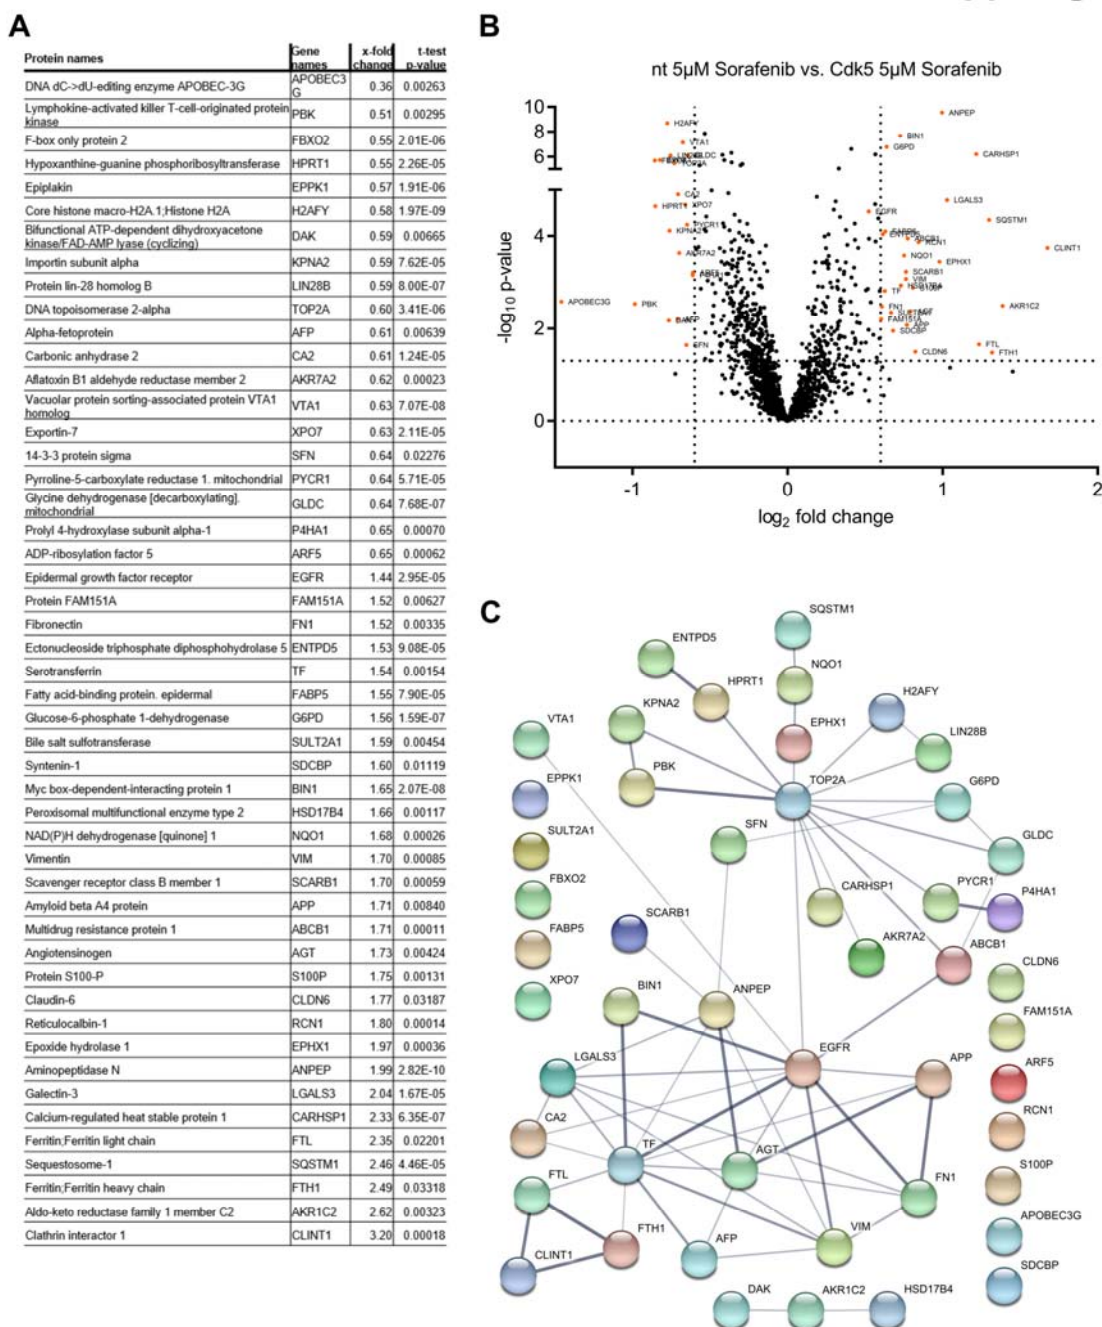

A

Supp. Fig. 4

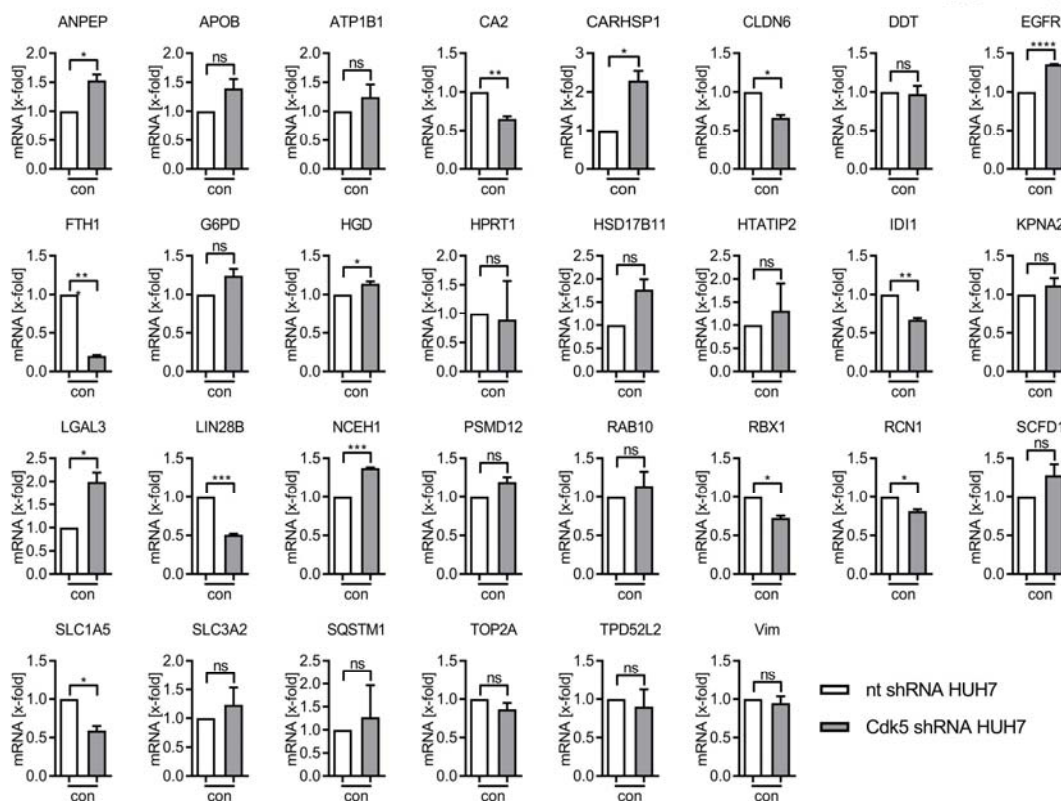

## Supp. Fig. 4

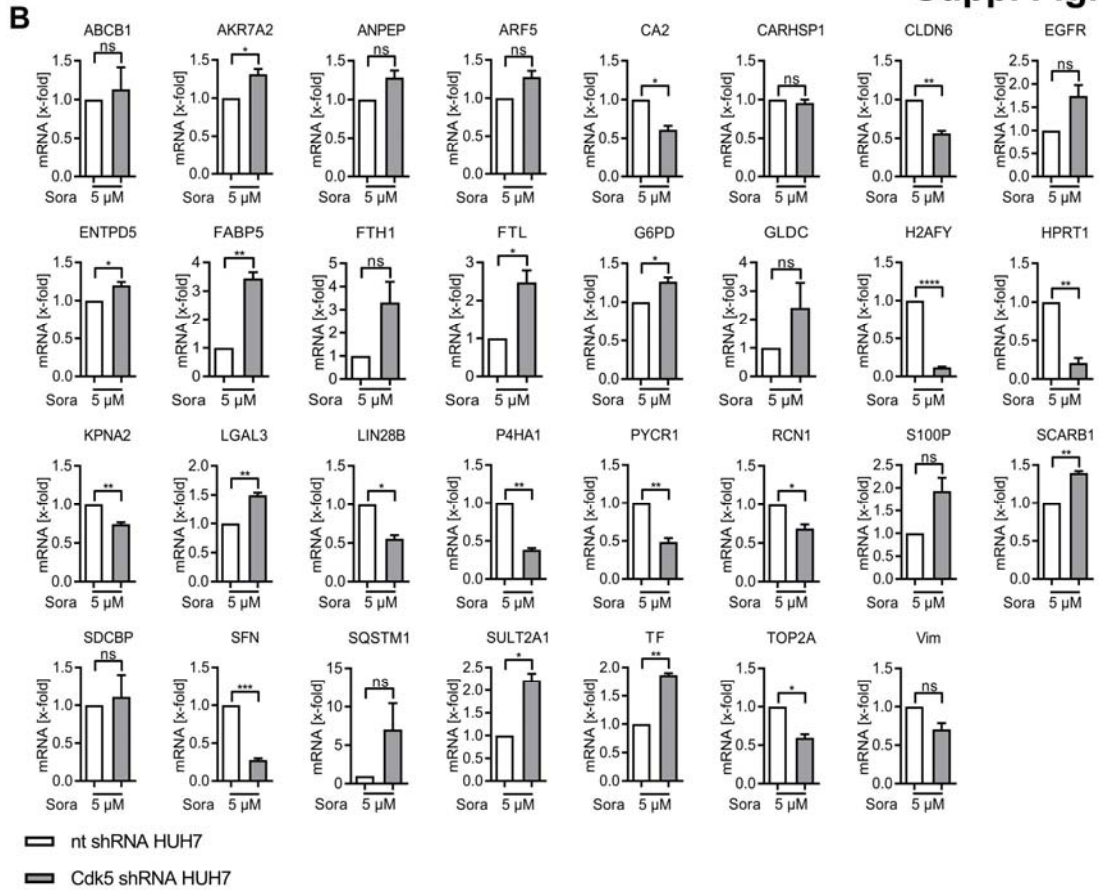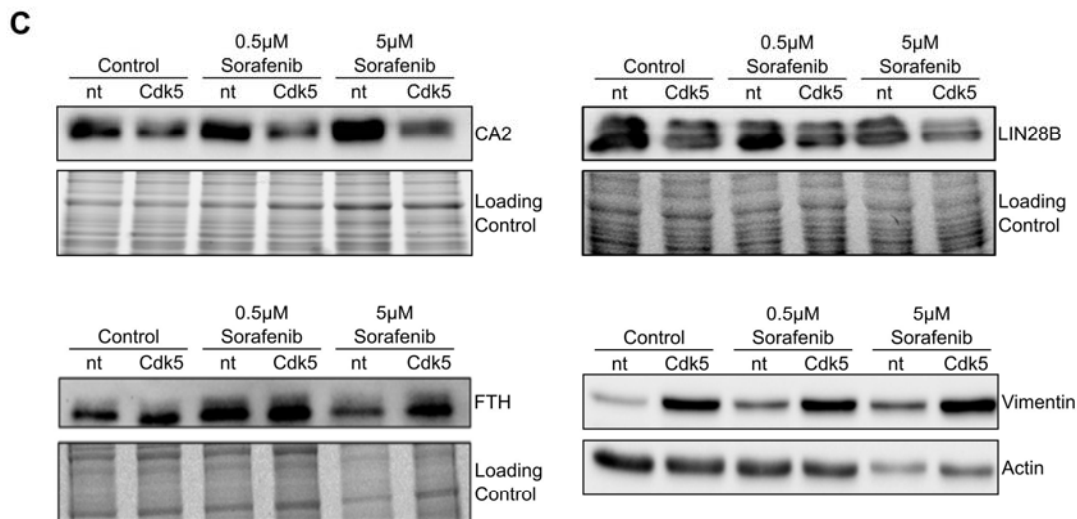

## Supp. Fig. 5

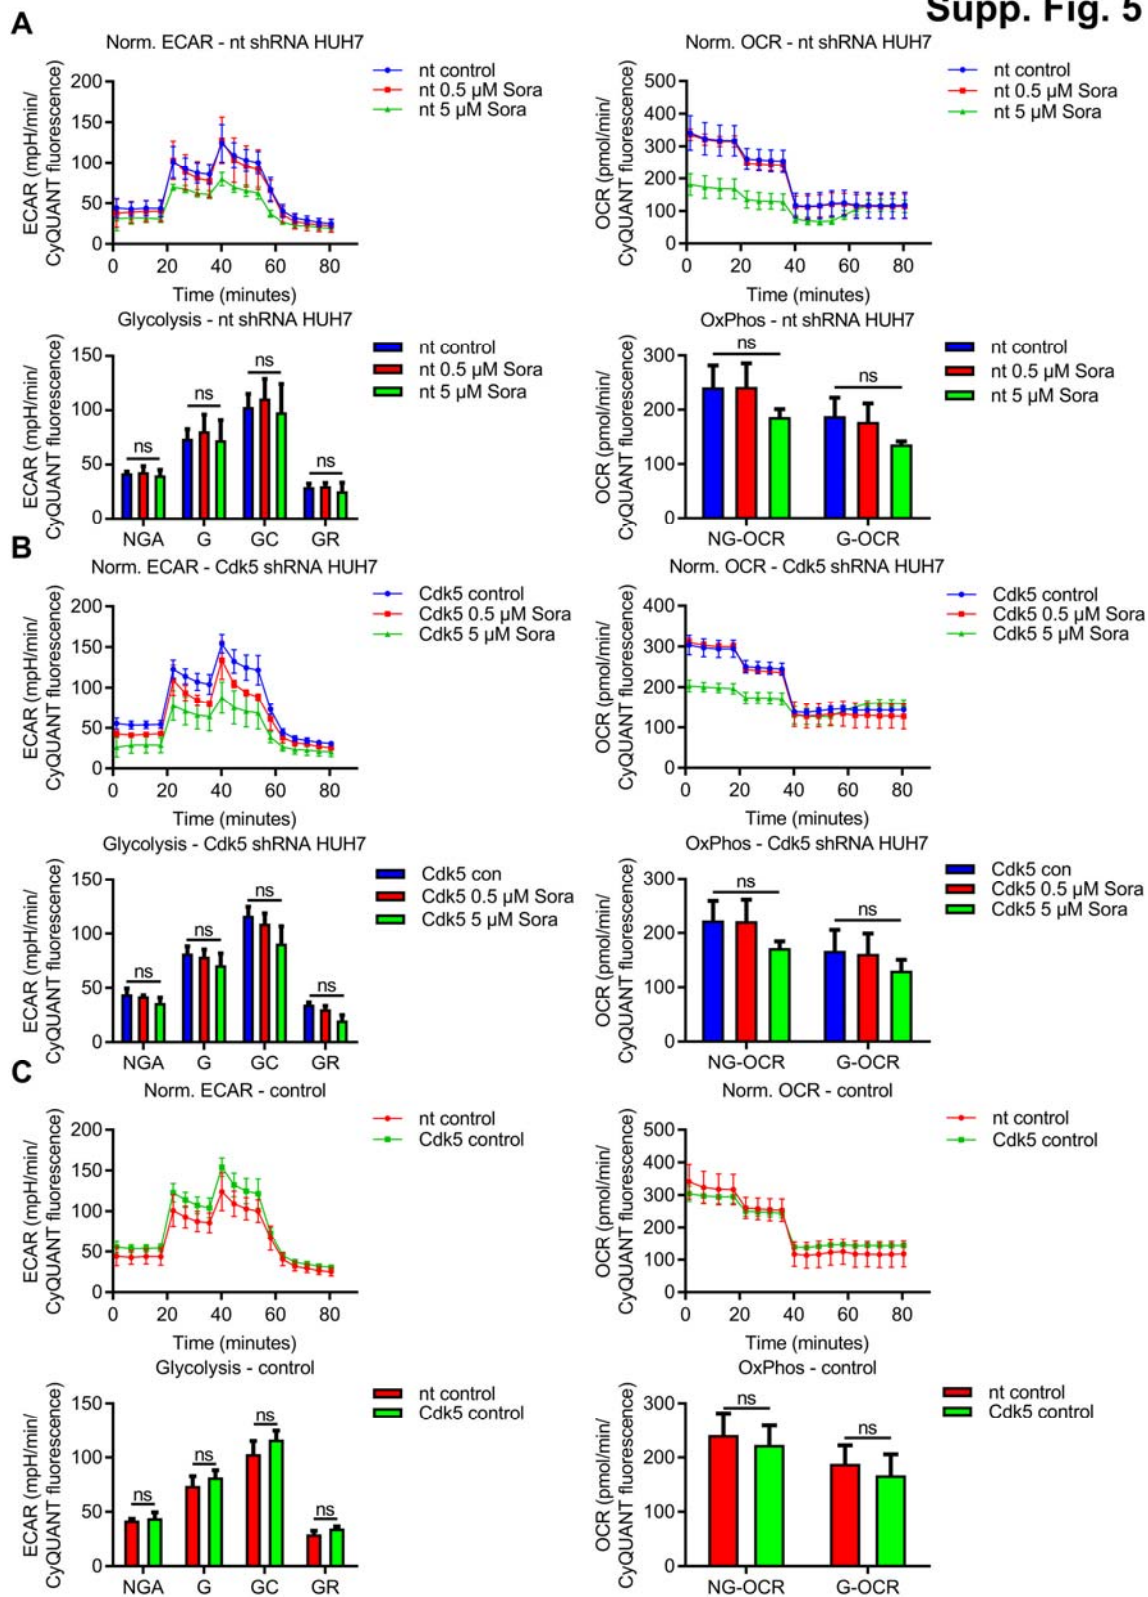

## Supp. Fig. 5

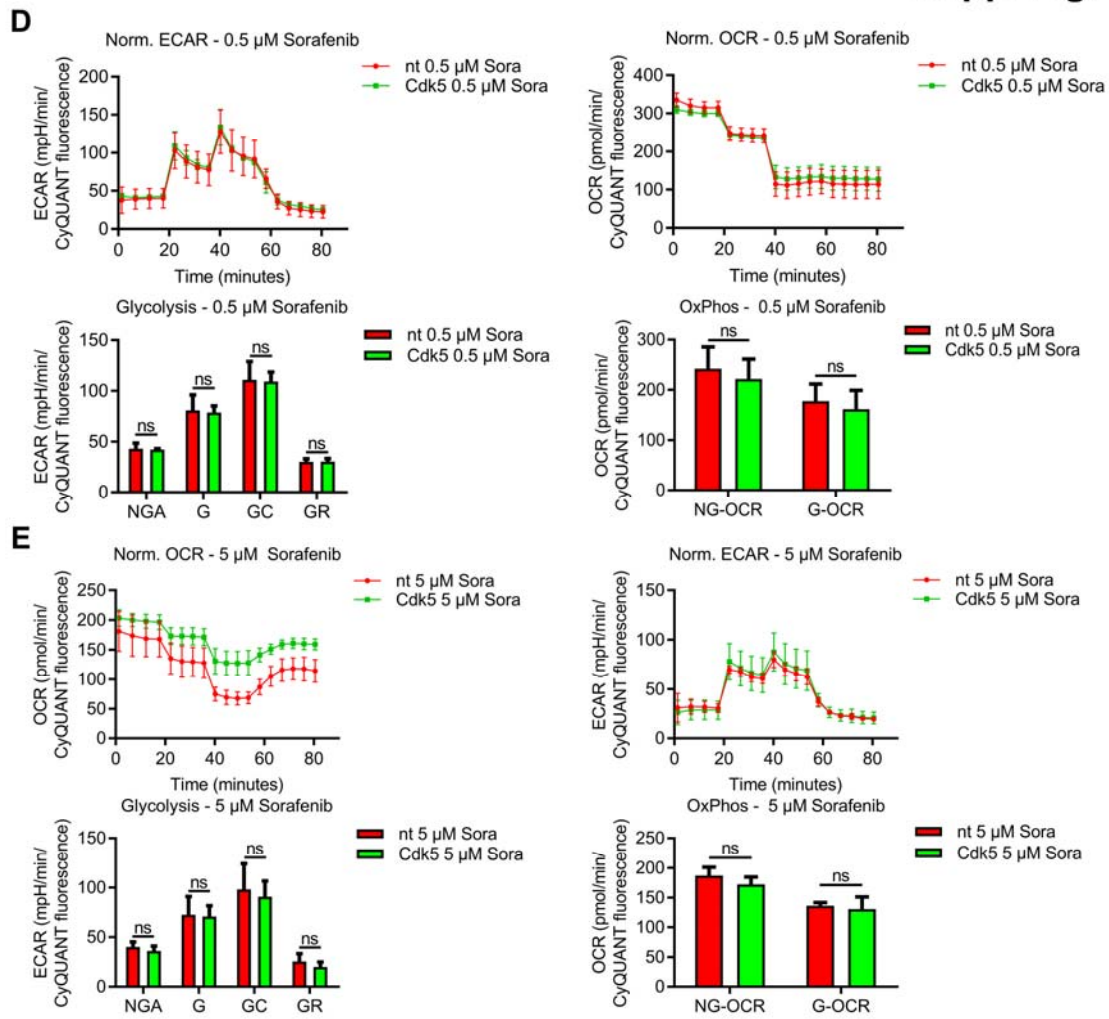

## Supp. Fig. 6

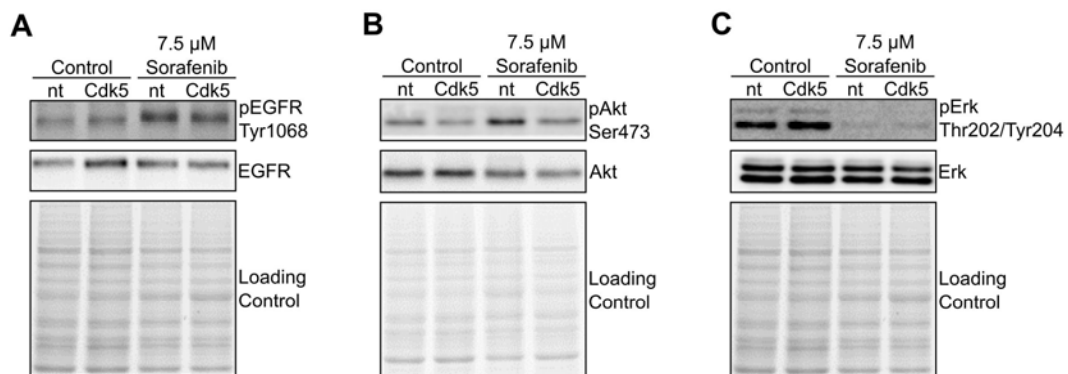

Supp. Fig. 7

A

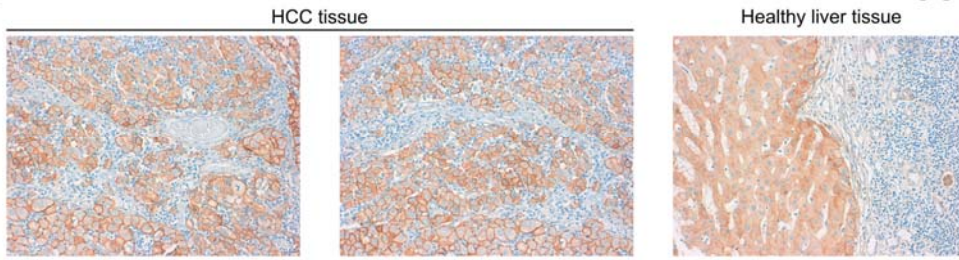

B

| EGFR percentage |          |           |            |                  |                      |
|-----------------|----------|-----------|------------|------------------|----------------------|
|                 |          | frequency | percentage | valid percentage | cumulated percentage |
| valid           | negative | 20        | 31.7       | 31.7             | 31.7                 |
|                 | 1-10%    | 2         | 3.2        | 3.2              | 34.9                 |
|                 | 11-50%   | 5         | 7.9        | 7.9              | 42.9                 |
|                 | 51-80%   | 5         | 7.9        | 7.9              | 50.8                 |
|                 | >80%     | 28        | 44.4       | 44.4             | 95.2                 |
|                 | missing  | 3         | 4.8        | 4.8              | 100                  |
| total           |          | 63        | 100        | 100              |                      |

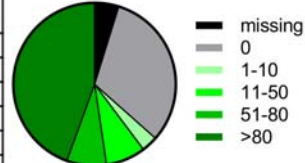

C

| EGFR intensity |         |           |            |                  |                      |
|----------------|---------|-----------|------------|------------------|----------------------|
|                |         | frequency | percentage | valid percentage | cumulated percentage |
| valid          | 0       | 20        | 31.7       | 31.7             | 31.7                 |
|                | weak    | 13        | 20.6       | 20.6             | 52.4                 |
|                | interm. | 13        | 20.6       | 20.6             | 73                   |
|                | strong  | 14        | 22.2       | 22.2             | 95.2                 |
|                | missing | 3         | 4.8        | 4.8              | 100                  |
|                | total   | 63        | 100        | 100              |                      |

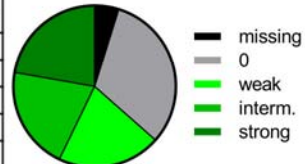

D

| EGFR – IRS |       |           |            |                  |                      |
|------------|-------|-----------|------------|------------------|----------------------|
|            |       | frequency | percentage | valid percentage | cumulated percentage |
| valid      | 0     | 20        | 31.7       | 31.7             | 31.7                 |
|            | 1     | 1         | 1.6        | 1.6              | 33.3                 |
|            | 2     | 5         | 7.9        | 7.9              | 41.3                 |
|            | 4     | 9         | 14.3       | 14.3             | 55.6                 |
|            | 5     | 3         | 4.8        | 4.8              | 60.3                 |
|            | 6     | 3         | 4.8        | 4.8              | 65.1                 |
|            | 8     | 9         | 14.3       | 14.3             | 79.4                 |
|            | 9     | 2         | 3.2        | 3.2              | 82.5                 |
|            | 12    | 11        | 17.5       | 17.5             | 100                  |
|            | total | 63        | 100        | 100              |                      |

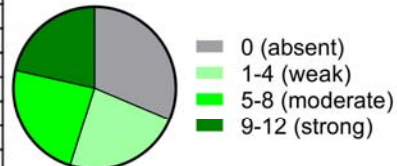

A

## Supp. Table 1

| R-classification |       |           |            |                  |                      |
|------------------|-------|-----------|------------|------------------|----------------------|
|                  |       | frequency | percentage | valid percentage | cumulated percentage |
| valid            | R0    | 54        | 85.7       | 85.7             | 85.7                 |
|                  | R1    | 5         | 7.9        | 7.9              | 93.7                 |
|                  | X     | 4         | 6.3        | 6.3              | 100                  |
|                  | total | 63        | 100        | 100              |                      |

| R-classification * EGFR percentage of positive cells - contingency table |    |                                   |       |        |        |       |         |       |
|--------------------------------------------------------------------------|----|-----------------------------------|-------|--------|--------|-------|---------|-------|
| number                                                                   |    |                                   |       |        |        |       |         |       |
|                                                                          |    | EGFR percentage of positive cells |       |        |        |       |         | total |
|                                                                          |    | negative                          | < 10% | 11-50% | 51-80% | > 80% | missing |       |
| R-classification                                                         | R0 | 17                                | 2     | 4      | 5      | 23    | 3       | 54    |
|                                                                          | R1 | 2                                 | 0     | 0      | 0      | 3     | 0       | 5     |
|                                                                          | X  | 1                                 | 0     | 1      | 0      | 2     | 0       | 4     |
| total                                                                    |    | 20                                | 2     | 5      | 5      | 28    | 3       | 63    |

| chi-squared test      |                    |    |                                     |
|-----------------------|--------------------|----|-------------------------------------|
|                       | value              | df | Asymptotic significance (two-sided) |
| Chi-squared (Pearson) | 4.058 <sup>a</sup> | 10 | 0.945                               |
| Likelihood-Quotient   | 5.302              | 10 | 0.87                                |
| Number of valid cases | 63                 |    |                                     |

a. 16 cells (88.9%) have an expected frequency of 5 or less. The smallest expected frequency is 0.13.

| R-classification * EGFR staining intensity – contingency table |    |                         |      |              |        |         |       |
|----------------------------------------------------------------|----|-------------------------|------|--------------|--------|---------|-------|
| number                                                         |    |                         |      |              |        |         |       |
|                                                                |    | EGFR staining intensity |      |              |        |         | total |
|                                                                |    | 0                       | weak | intermediate | strong | missing |       |
| R-classification                                               | R0 | 17                      | 11   | 13           | 10     | 3       | 54    |
|                                                                | R1 | 2                       | 1    | 0            | 2      | 0       | 5     |
|                                                                | X  | 1                       | 1    | 0            | 2      | 0       | 4     |
| total                                                          |    | 20                      | 13   | 13           | 14     | 3       | 63    |

| chi-squared test      |                    |    |                                     |
|-----------------------|--------------------|----|-------------------------------------|
|                       | value              | df | Asymptotic significance (two-sided) |
| Chi-squared (Pearson) | 5.306 <sup>a</sup> | 8  | 0.724                               |
| Likelihood-Quotient   | 7.081              | 8  | 0.528                               |
| Number of valid cases | 63                 |    |                                     |

a. 11 cells (88.9%) have an expected frequency of 5 or less. The smallest expected frequency is 0.19.



## Supp. Table 1

| r-classification * EGFR IRS – contingency table |    |            |   |   |   |   |   |   |   |    |       |
|-------------------------------------------------|----|------------|---|---|---|---|---|---|---|----|-------|
|                                                 |    | number     |   |   |   |   |   |   |   |    |       |
|                                                 |    | EGFR – IRS |   |   |   |   |   |   |   |    |       |
|                                                 |    | 0          | 1 | 2 | 4 | 5 | 6 | 8 | 9 | 12 | total |
| R-<br>classification                            | R0 | 17         | 1 | 4 | 8 | 3 | 3 | 9 | 2 | 7  | 54    |
|                                                 | R1 | 2          | 0 | 0 | 1 | 0 | 0 | 0 | 0 | 2  | 5     |
|                                                 | X  | 1          | 0 | 1 | 0 | 0 | 0 | 0 | 0 | 2  | 4     |
| total                                           |    | 20         | 1 | 5 | 9 | 3 | 3 | 9 | 2 | 11 | 63    |

| chi-squared test                                                                                         |                     |    |                                            |
|----------------------------------------------------------------------------------------------------------|---------------------|----|--------------------------------------------|
|                                                                                                          | value               | df | Asymptotic<br>significance (two-<br>sided) |
| Chi-squared<br>(Pearson)                                                                                 | 10.252 <sup>a</sup> | 16 | 0.853                                      |
| Likelihood-<br>Quotient                                                                                  | 12.064              | 16 | 0.74                                       |
| Number of valid<br>cases                                                                                 | 63                  |    |                                            |
| a. 23 cells (85.2%) have an expected frequency of 5 or less. The<br>smallest expected frequency is 0.06. |                     |    |                                            |

B

Supp. Table 1

| Frequency of recurrence |       |           |            |                  |                      |
|-------------------------|-------|-----------|------------|------------------|----------------------|
|                         |       | frequency | percentage | valid percentage | cumulated percentage |
| valid                   | 0     | 40        | 63.5       | 63.5             | 63.5                 |
|                         | 1     | 17        | 27         | 27               | 90.5                 |
|                         | n.s.  | 6         | 9.5        | 9.5              | 100                  |
|                         | total | 63        | 100        | 100              |                      |

| Frequency of recurrence * EGFR percentage of positive cells - contingency table |      |                                   |       |        |        |       |         |       |
|---------------------------------------------------------------------------------|------|-----------------------------------|-------|--------|--------|-------|---------|-------|
|                                                                                 |      | number                            |       |        |        |       |         | total |
|                                                                                 |      | EGFR percentage of positive cells |       |        |        |       |         |       |
|                                                                                 |      | negative                          | < 10% | 11-50% | 51-80% | > 80% | missing |       |
| frequency of recurrence                                                         | 0    | 12                                | 2     | 5      | 4      | 16    | 1       | 40    |
|                                                                                 | 1    | 7                                 | 0     | 0      | 1      | 8     | 1       | 17    |
|                                                                                 | n.s. | 1                                 | 0     | 0      | 0      | 4     | 1       | 6     |
| total                                                                           |      | 20                                | 2     | 5      | 5      | 28    | 3       | 63    |

| chi-squared test      |                    |    |                                     |
|-----------------------|--------------------|----|-------------------------------------|
|                       | value              | df | Asymptotic significance (two-sided) |
| Chi-squared (Pearson) | 8.881 <sup>a</sup> | 10 | 0.543                               |
| Likelihood-Quotient   | 11.031             | 10 | 0.355                               |
| Number of valid cases | 63                 |    |                                     |

a. 14 cells (77.8%) have an expected frequency of 5 or less. The smallest expected frequency is 0.19.

| Frequency of recurrence * EGFR staining intensity – contingency table |      |                         |      |              |        |         |       |
|-----------------------------------------------------------------------|------|-------------------------|------|--------------|--------|---------|-------|
|                                                                       |      | number                  |      |              |        |         | total |
|                                                                       |      | EGFR staining intensity |      |              |        |         |       |
|                                                                       |      | 0                       | weak | intermediate | strong | missing |       |
| frequency of recurrence                                               | 0    | 12                      | 9    | 11           | 7      | 1       | 40    |
|                                                                       | 1    | 7                       | 4    | 1            | 4      | 1       | 17    |
|                                                                       | n.s. | 1                       | 0    | 1            | 3      | 1       | 6     |
| total                                                                 |      | 20                      | 13   | 13           | 14     | 3       | 63    |

| chi-squared test      |                    |    |                                     |
|-----------------------|--------------------|----|-------------------------------------|
|                       | value              | df | Asymptotic significance (two-sided) |
| Chi-squared (Pearson) | 9.829 <sup>a</sup> | 8  | 0.277                               |
| Likelihood-Quotient   | 10.602             | 8  | 0.225                               |
| Number of valid cases | 63                 |    |                                     |

a. 10 cells (66.7%) have an expected frequency of 5 or less. The smallest expected frequency is 0.29.

**Supp. Table 1**

| Frequency of recurrence * EGFR IRS – contingency table |      |            |   |   |   |   |   |   |   |    |       |
|--------------------------------------------------------|------|------------|---|---|---|---|---|---|---|----|-------|
|                                                        |      | number     |   |   |   |   |   |   |   |    | total |
|                                                        |      | EGFR – IRS |   |   |   |   |   |   |   |    |       |
|                                                        |      | 0          | 1 | 2 | 4 | 5 | 6 | 8 | 9 | 12 |       |
| frequency of recurrence                                | 0    | 12         | 1 | 5 | 5 | 1 | 2 | 8 | 2 | 4  | 40    |
|                                                        | 1    | 7          | 0 | 0 | 4 | 1 | 1 | 0 | 0 | 4  | 17    |
|                                                        | n.s. | 1          | 0 | 0 | 0 | 1 | 0 | 1 | 0 | 3  | 6     |
| total                                                  |      | 20         | 1 | 5 | 9 | 3 | 3 | 9 | 2 | 11 | 63    |

| chi-squared test      |                     |    |                                     |
|-----------------------|---------------------|----|-------------------------------------|
|                       | value               | df | Asymptotic significance (two-sided) |
| Chi-squared (Pearson) | 18.742 <sup>a</sup> | 16 | 0.282                               |
| Likelihood-Quotient   | 23.109              | 16 | 0.111                               |
| Number of valid cases | 63                  |    |                                     |

a. 22 cells (81.5%) have an expected frequency of 5 or less. The smallest expected frequency is 0.10.

C

Supp. Table 1

| cause of death |                 |           |            |                  |                      |
|----------------|-----------------|-----------|------------|------------------|----------------------|
|                |                 | frequency | percentage | valid percentage | cumulated percentage |
| valid          | not determined  | 42        | 66.7       | 66.7             | 66.7                 |
|                | tumor unrelated | 2         | 3.2        | 3.2              | 69.8                 |
|                | tumor related   | 14        | 22.2       | 22.2             | 92.1                 |
|                | n.s.            | 5         | 7.9        | 7.9              | 100                  |
|                | total           | 63        | 100        | 100              |                      |

| cause of death * EGFR percentage of positive cells - contingency table |                 |                                   |      |        |        |       |         |       |
|------------------------------------------------------------------------|-----------------|-----------------------------------|------|--------|--------|-------|---------|-------|
|                                                                        |                 | number                            |      |        |        |       |         | total |
|                                                                        |                 | EGFR percentage of positive cells |      |        |        |       | missing |       |
|                                                                        |                 | negative                          | <10% | 11-50% | 51-80% | > 80% |         |       |
| cause of death                                                         | not determined  | 11                                | 1    | 4      | 5      | 19    | 2       | 42    |
|                                                                        | tumor unrelated | 1                                 | 0    | 0      | 0      | 1     | 0       | 2     |
|                                                                        | tumor related   | 7                                 | 1    | 1      | 0      | 4     | 1       | 14    |
|                                                                        | n.s.            | 1                                 | 0    | 0      | 0      | 4     | 0       | 5     |
| total                                                                  |                 | 20                                | 2    | 5      | 5      | 28    | 3       | 63    |

| chi-squared test      |                    |    |                                     |
|-----------------------|--------------------|----|-------------------------------------|
|                       | value              | df | Asymptotic significance (two-sided) |
| Chi-squared (Pearson) | 9.241 <sup>a</sup> | 15 | 0.865                               |
| Likelihood-Quotient   | 11.348             | 15 | 0.728                               |
| Number of valid cases | 63                 |    |                                     |

a. 21 cells (87.5%) have an expected frequency of 5 or less. The smallest expected frequency is 0.06.

| cause of death * EGFR staining intensity – contingency table |                 |                         |      |              |        |         |       |
|--------------------------------------------------------------|-----------------|-------------------------|------|--------------|--------|---------|-------|
|                                                              |                 | number                  |      |              |        |         | total |
|                                                              |                 | EGFR staining intensity |      |              |        |         |       |
|                                                              |                 | 0                       | weak | intermediate | strong | missing |       |
| cause of death                                               | not determined  | 11                      | 11   | 10           | 8      | 2       | 42    |
|                                                              | tumor unrelated | 1                       | 0    | 0            | 1      | 0       | 2     |
|                                                              | tumor related   | 7                       | 2    | 2            | 2      | 1       | 14    |
|                                                              | n.s.            | 1                       | 0    | 1            | 3      | 0       | 5     |
| total                                                        |                 | 20                      | 13   | 13           | 14     | 3       | 63    |

| chi-squared test      |                     |    |                                     |
|-----------------------|---------------------|----|-------------------------------------|
|                       | value               | df | Asymptotic significance (two-sided) |
| Chi-squared (Pearson) | 10.536 <sup>a</sup> | 12 | 0.569                               |
| Likelihood-Quotient   | 11.373              | 12 | 0.497                               |
| Number of valid cases | 63                  |    |                                     |

a. 16 cells (80.0%) have an expected frequency of 5 or less. The smallest expected frequency is 0.1.

**Supp. Table 1**

| cause of death * EGFR IRS – contingency table |                 |            |   |   |   |   |   |   |   |    |       |
|-----------------------------------------------|-----------------|------------|---|---|---|---|---|---|---|----|-------|
|                                               |                 | number     |   |   |   |   |   |   |   |    |       |
|                                               |                 | EGFR – IRS |   |   |   |   |   |   |   |    | total |
|                                               |                 | 0          | 1 | 2 | 4 | 5 | 6 | 8 | 9 | 12 |       |
| cause of death                                | not determined  | 11         | 1 | 3 | 8 | 2 | 3 | 7 | 2 | 5  | 42    |
|                                               | tumor unrelated | 1          | 0 | 0 | 0 | 0 | 0 | 0 | 0 | 1  | 2     |
|                                               | tumor related   | 7          | 0 | 2 | 1 | 1 | 0 | 1 | 0 | 2  | 14    |
|                                               | n.s.            | 1          | 0 | 0 | 0 | 0 | 0 | 1 | 0 | 3  | 5     |
| total                                         |                 | 20         | 1 | 5 | 9 | 3 | 3 | 9 | 2 | 11 | 63    |

| chi-squared test                                                                                      |                     |    |                                     |
|-------------------------------------------------------------------------------------------------------|---------------------|----|-------------------------------------|
|                                                                                                       | value               | df | Asymptotic significance (two-sided) |
| Chi-squared (Pearson)                                                                                 | 17.557 <sup>a</sup> | 24 | 0.824                               |
| Likelihood-Quotient                                                                                   | 19.047              | 24 | 0.749                               |
| Number of valid cases                                                                                 | 63                  |    |                                     |
| a. 32 cells (88.9%) have an expected frequency of 5 or less. The smallest expected frequency is 0.03. |                     |    |                                     |

D

Supp. Table 1

| tumor score |    |           |            |                  |                      |
|-------------|----|-----------|------------|------------------|----------------------|
|             |    | frequency | percentage | valid percentage | cumulated percentage |
| valid       | 1  | 27        | 42.9       | 42.9             | 42.9                 |
|             | 2  | 17        | 27.0       | 27.0             | 69.8                 |
|             | 2a | 2         | 3.2        | 3.2              | 73.0                 |
|             | 2b | 2         | 3.2        | 3.2              | 76.2                 |
|             | 3  | 1         | 1.6        | 1.6              | 77.8                 |
|             | 3a | 6         | 9.5        | 9.5              | 87.3                 |
|             | 3b | 1         | 1.6        | 1.6              | 88.9                 |
|             | 4  | 1         | 1.6        | 1.6              | 90.5                 |
|             | X  | 6         | 9.5        | 9.5              | 100.0                |
| total       |    | 63        | 100        | 100.0            |                      |

| tumor score * EGFR percentage of positive cells - contingency table |    |                                   |       |        |        |       |         |         |
|---------------------------------------------------------------------|----|-----------------------------------|-------|--------|--------|-------|---------|---------|
|                                                                     |    | number                            |       |        |        |       |         | total   |
|                                                                     |    | EGFR percentage of positive cells |       |        |        |       | missing |         |
|                                                                     |    | negative                          | < 10% | 11-50% | 51-80% | > 80% |         | missing |
| valid                                                               | 1  | 10                                | 1     | 1      | 2      | 12    | 1       | 27      |
|                                                                     | 2  | 5                                 | 1     | 3      | 1      | 6     | 1       | 17      |
|                                                                     | 2a | 0                                 | 0     | 0      | 1      | 1     | 0       | 2       |
|                                                                     | 2b | 1                                 | 0     | 0      | 1      | 0     | 0       | 2       |
|                                                                     | 3  | 0                                 | 0     | 0      | 0      | 0     | 1       | 1       |
|                                                                     | 3a | 1                                 | 0     | 0      | 0      | 5     | 0       | 6       |
|                                                                     | 3b | 1                                 | 0     | 0      | 0      | 0     | 0       | 1       |
|                                                                     | 4  | 0                                 | 0     | 0      | 0      | 1     | 0       | 1       |
|                                                                     | X  | 2                                 | 0     | 1      | 0      | 3     | 0       | 6       |
| total                                                               |    | 20                                | 2     | 5      | 5      | 28    | 3       | 63      |

| chi-squared test                                                                                      |                     |    |                                     |
|-------------------------------------------------------------------------------------------------------|---------------------|----|-------------------------------------|
|                                                                                                       | value               | df | Asymptotic significance (two-sided) |
| Chi-squared (Pearson)                                                                                 | 44.017 <sup>a</sup> | 40 | 0.305                               |
| Likelihood-Quotient                                                                                   | 29.305              | 40 | 0.894                               |
| Number of valid cases                                                                                 | 63                  |    |                                     |
| a. 50 cells (92.6%) have an expected frequency of 5 or less. The smallest expected frequency is 0.03. |                     |    |                                     |

## Supp. Table 1

| tumor score * EGFR staining intensity – contingency table |    |                         |      |              |        |         |       |
|-----------------------------------------------------------|----|-------------------------|------|--------------|--------|---------|-------|
| number                                                    |    |                         |      |              |        |         |       |
|                                                           |    | EGFR staining intensity |      |              |        |         | total |
|                                                           |    | 0                       | weak | intermediate | strong | missing |       |
| valid                                                     | 1  | 10                      | 5    | 5            | 6      | 1       | 27    |
|                                                           | 2  | 5                       | 3    | 6            | 2      | 1       | 17    |
|                                                           | 2a | 0                       | 0    | 1            | 1      | 0       | 2     |
|                                                           | 2b | 1                       | 0    | 1            | 0      | 0       | 2     |
|                                                           | 3  | 0                       | 0    | 0            | 0      | 1       | 1     |
|                                                           | 3a | 1                       | 3    | 0            | 2      | 0       | 6     |
|                                                           | 3b | 1                       | 0    | 0            | 0      | 0       | 1     |
|                                                           | 4  | 0                       | 0    | 0            | 1      | 0       | 1     |
|                                                           | X  | 2                       | 2    | 0            | 2      | 0       | 6     |
| total                                                     |    | 20                      | 13   | 13           | 14     | 3       | 63    |

| chi-squared test      |                     |    |                                     |
|-----------------------|---------------------|----|-------------------------------------|
|                       | value               | df | Asymptotic significance (two-sided) |
| Chi-squared (Pearson) | 40.619 <sup>a</sup> | 32 | 0.141                               |
| Likelihood-Quotient   | 29.875              | 32 | 0.575                               |
| Number of valid cases | 63                  |    |                                     |

a. 40 cells (88.9%) have an expected frequency of 5 or less. The smallest expected frequency is 0.05.

| tumor score * EGFR IRS – contingency table |    |            |   |   |   |   |   |   |   |    |       |
|--------------------------------------------|----|------------|---|---|---|---|---|---|---|----|-------|
| number                                     |    |            |   |   |   |   |   |   |   |    |       |
|                                            |    | EGFR – IRS |   |   |   |   |   |   |   |    | total |
|                                            |    | 0          | 1 | 2 | 4 | 5 | 6 | 8 | 9 | 12 |       |
| valid                                      | 1  | 10         | 1 | 1 | 3 | 1 | 0 | 5 | 2 | 4  | 27    |
|                                            | 2  | 5          | 0 | 3 | 2 | 1 | 1 | 3 | 0 | 2  | 17    |
|                                            | 2a | 0          | 0 | 0 | 0 | 0 | 1 | 0 | 0 | 1  | 2     |
|                                            | 2b | 1          | 0 | 0 | 0 | 0 | 1 | 0 | 0 | 0  | 2     |
|                                            | 3  | 0          | 0 | 0 | 0 | 1 | 0 | 0 | 0 | 0  | 1     |
|                                            | 3a | 1          | 0 | 0 | 3 | 0 | 0 | 1 | 0 | 1  | 6     |
|                                            | 3b | 1          | 0 | 0 | 0 | 0 | 0 | 0 | 0 | 0  | 1     |
|                                            | 4  | 0          | 0 | 0 | 0 | 0 | 0 | 0 | 0 | 1  | 1     |
|                                            | X  | 2          | 0 | 1 | 1 | 0 | 0 | 0 | 0 | 2  | 6     |
| total                                      |    | 20         | 1 | 5 | 9 | 3 | 3 | 9 | 2 | 11 | 63    |

| chi-squared test      |                     |    |                                     |
|-----------------------|---------------------|----|-------------------------------------|
|                       | value               | df | Asymptotic significance (two-sided) |
| Chi-squared (Pearson) | 67.241 <sup>a</sup> | 64 | 0.367                               |
| Likelihood-Quotient   | 45.01               | 64 | 0.966                               |
| Number of valid cases | 63                  |    |                                     |

a. 79 cells (97.5 %) have an expected frequency of 5 or less. The smallest expected frequency is 0.02.

E

Supp. Table 1

| tumor grading |                           |           |            |                  |                      |
|---------------|---------------------------|-----------|------------|------------------|----------------------|
|               |                           | frequency | percentage | valid percentage | cumulated percentage |
| valid         | no grading or missing     | 6         | 9.5        | 9.5              | 9.5                  |
|               | Well-differentiated       | 11        | 17.5       | 17.5             | 27.0                 |
|               | moderately-differentiated | 29        | 46.0       | 46.0             | 73.0                 |
|               | poorly-differentiated     | 17        | 27.0       | 27.0             | 100.0                |
|               | total                     | 63        | 100        | 100              |                      |

| tumor grading * EGFR percentage of positive cells - contingency table |                           |                                   |      |        |        |       |         |       |
|-----------------------------------------------------------------------|---------------------------|-----------------------------------|------|--------|--------|-------|---------|-------|
|                                                                       |                           | number                            |      |        |        |       |         |       |
|                                                                       |                           | EGFR percentage of positive cells |      |        |        |       |         |       |
|                                                                       |                           | negative                          | <10% | 11-50% | 51-80% | > 80% | missing | total |
| valid                                                                 | no grading or missing     | 1                                 | 1    | 1      | 0      | 3     | 0       | 6     |
|                                                                       | Well-differentiated       | 2                                 | 0    | 1      | 2      | 6     | 0       | 11    |
|                                                                       | moderately-differentiated | 10                                | 1    | 3      | 2      | 12    | 1       | 29    |
|                                                                       | poorly-differentiated     | 7                                 | 0    | 0      | 1      | 7     | 2       | 17    |
|                                                                       | total                     | 20                                | 2    | 5      | 5      | 28    | 3       | 63    |

| chi-squared test                                                                                      |                     |    |                                     |
|-------------------------------------------------------------------------------------------------------|---------------------|----|-------------------------------------|
|                                                                                                       | value               | df | Asymptotic significance (two-sided) |
| Chi-squared (Pearson)                                                                                 | 13.227 <sup>a</sup> | 15 | 0.585                               |
| Likelihood-Quotient                                                                                   | 14.112              | 15 | 0.517                               |
| Number of valid cases                                                                                 | 63                  |    |                                     |
| a. 20 cells (83.3%) have an expected frequency of 5 or less. The smallest expected frequency is 0.19. |                     |    |                                     |



## Supp. Table 1

| tumor grading * EGFR staining intensity – contingency table |                           |                         |      |              |        |         |       |
|-------------------------------------------------------------|---------------------------|-------------------------|------|--------------|--------|---------|-------|
| number                                                      |                           |                         |      |              |        |         |       |
|                                                             |                           | EGFR staining intensity |      |              |        |         | total |
|                                                             |                           | 0                       | weak | intermediate | strong | missing |       |
| valid                                                       | no grading or missing     | 1                       | 3    | 0            | 2      | 0       | 6     |
|                                                             | Well-differentiated       | 2                       | 2    | 6            | 1      | 0       | 11    |
|                                                             | moderately-differentiated | 10                      | 6    | 4            | 8      | 1       | 29    |
|                                                             | poorly-differentiated     | 7                       | 2    | 3            | 3      | 2       | 17    |
|                                                             | total                     | 20                      | 13   | 13           | 14     | 3       | 63    |

| chi-squared test      |                     |    |                                     |
|-----------------------|---------------------|----|-------------------------------------|
|                       | value               | df | Asymptotic significance (two-sided) |
| Chi-squared (Pearson) | 17.287 <sup>a</sup> | 12 | 0.139                               |
| Likelihood-Quotient   | 16.752              | 12 | 0.159                               |
| Number of valid cases | 63                  |    |                                     |

a. 15 cells (75.0%) have an expected frequency of 5 or less. The smallest expected frequency is 0.29.

| tumor grading * EGFR IRS – contingency table |                           |            |   |   |   |   |   |   |   |    |       |
|----------------------------------------------|---------------------------|------------|---|---|---|---|---|---|---|----|-------|
| number                                       |                           |            |   |   |   |   |   |   |   |    |       |
|                                              |                           | EGFR – IRS |   |   |   |   |   |   |   |    | total |
|                                              |                           | 0          | 1 | 2 | 4 | 5 | 6 | 8 | 9 | 12 |       |
| valid                                        | no grading or missing     | 1          | 1 | 1 | 1 | 0 | 0 | 0 | 0 | 2  | 6     |
|                                              | Well-differentiated       | 2          | 0 | 1 | 1 | 0 | 2 | 4 | 0 | 1  | 11    |
|                                              | moderately-differentiated | 10         | 0 | 3 | 5 | 1 | 0 | 2 | 2 | 6  | 29    |
|                                              | poorly-differentiated     | 7          | 0 | 0 | 2 | 2 | 1 | 3 | 0 | 2  | 17    |
|                                              | total                     | 20         | 1 | 5 | 9 | 3 | 3 | 9 | 2 | 11 | 63    |

| chi-squared test      |                     |    |                                     |
|-----------------------|---------------------|----|-------------------------------------|
|                       | value               | df | Asymptotic significance (two-sided) |
| Chi-squared (Pearson) | 32.283 <sup>a</sup> | 24 | 0.12                                |
| Likelihood-Quotient   | 29.759              | 24 | 0.193                               |
| Number of valid cases | 63                  |    |                                     |

a. 33 cells (91.7%) have an expected frequency of 5 or less. The smallest expected frequency is 0.10.
